# Supplementary material for: A naringenin-based benzoxazine with an intramolecular hydrogen bond as both a thermal latent polymerization additive and property modifier for epoxy resins
Source: Royal Society of Chemistry journal article supplement (doi:10.1039/d0ra04702c), 2020-01-01
Supplement: d0ra04702c1.pdf [file d0ra04702c1.pdf]

## *Supporting Information*

# A Naringenin-Based Benzoxazine with an Intramolecular Hydrogen Bond as Both Thermal Latent Polymerization Additive and Property Modifier for Epoxy Resins

Boran Hao, Rui Yang, and Kan Zhang\*

School of Materials Science and Engineering, Jiangsu University, Zhenjiang, Jiangsu 212013, P. R. China

\*: To whom correspondence should be addressed:

Kan Zhang: [zhangkan@ujs.edu.cn](mailto:zhangkan@ujs.edu.cn)

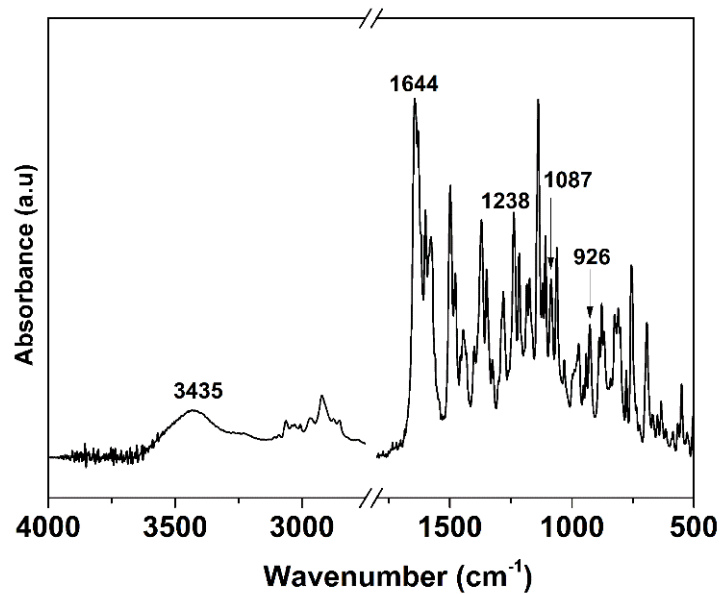

**Figure S1.** FT-IR spectrum of NAR-a.

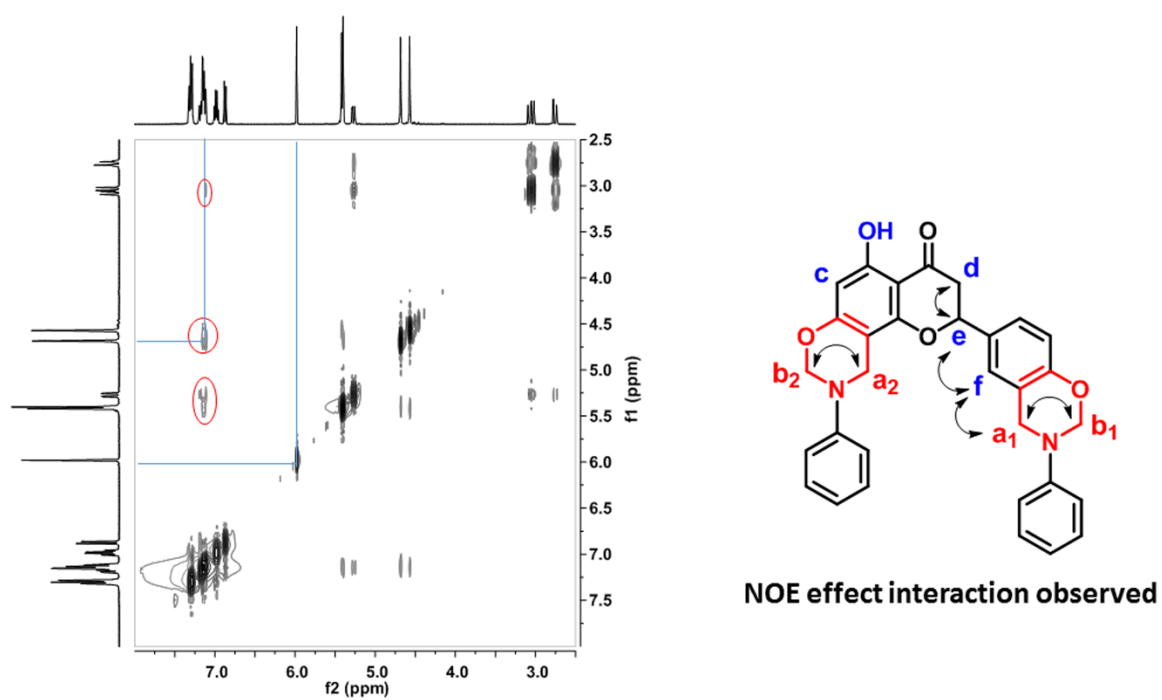

**Figure S2.** 2D <sup>1</sup>H-<sup>1</sup>H NOESY NMR spectrum of NAR-a.

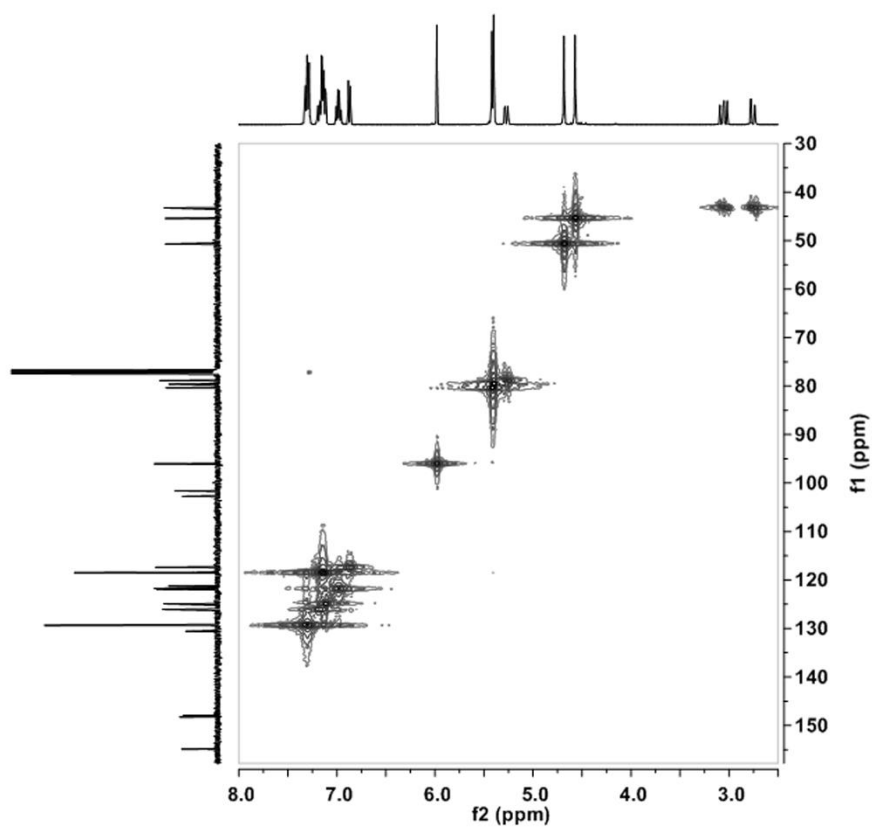

**Figure S3.** 2D  $^1\text{H}$ - $^{13}\text{C}$  HMQC NMR spectrum of NAR-a.

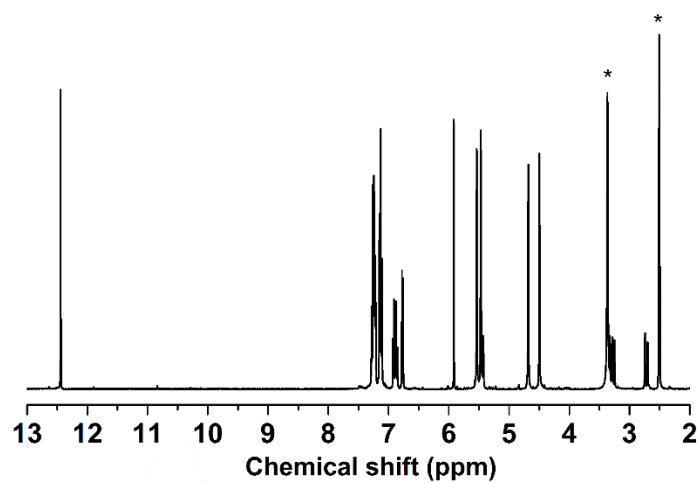

**Figure S4.**  $^1\text{H}$  NMR spectrum of NAR-a in  $\text{DMSO-}d_6$ .

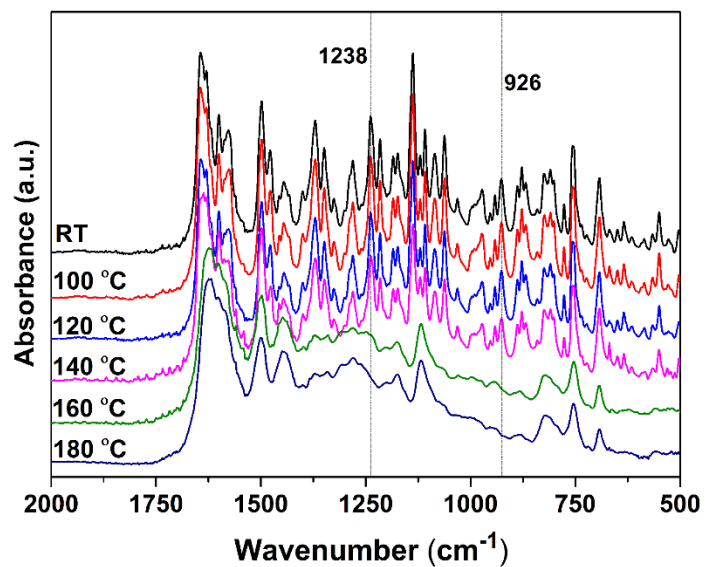

**Figure S5.** *In situ* FT-IR spectra of **NAR-a** during the step by step polymerization reaction.

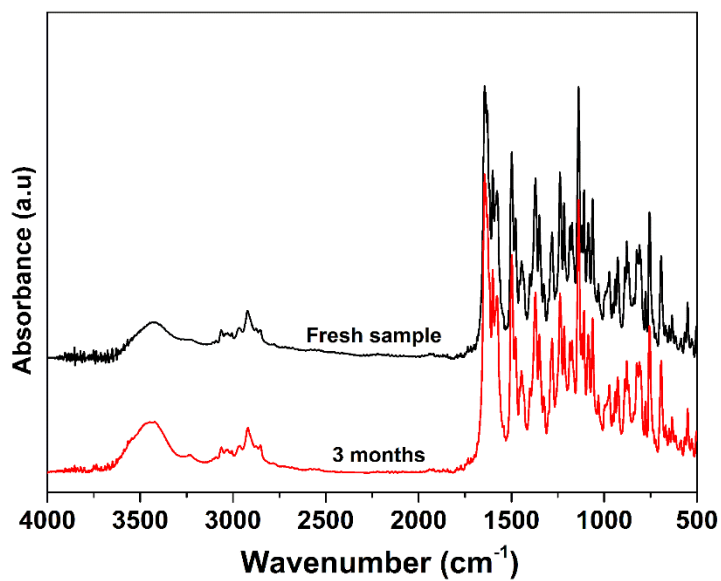

**Figure S6.** FT-IR spectra of **NAR-a** and that stored in the dark for 3 months.

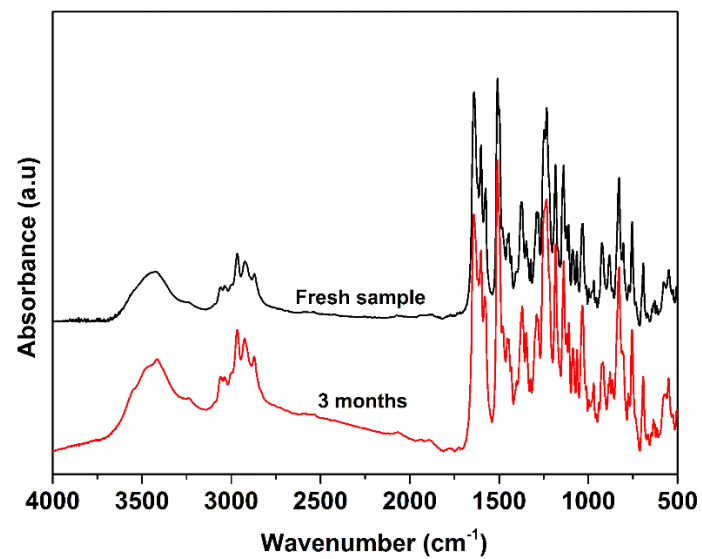

**Figure S7.** FT-IR spectra of **NAR-a/DGEBA** and that stored in the dark for 3 months.
